# Supplementary material for: Phosphazene/triisobutylaluminum-promoted anionic ring-opening polymerization of 1,2-epoxybutane initiated by secondary carbamates
Source: Royal Society of Chemistry journal article supplement (doi:10.1039/c7py00675f), 2017-01-01
Supplement: c7py00675f1.pdf [file c7py00675f1.pdf]

**Supporting Information for**  
**Phosphazene/Triisobutylaluminum-Promoted Anionic Ring-Opening Polymerization of 1,2-Epoxybutane Initiated by Secondary Carbamates**

*Lilia Hassouna, Nicolas Illy\* and Philippe Guégan*

Sorbonne Universités, UPMC Univ Paris 6, CNRS, Institut Parisien de Chimie Moléculaire,  
Equipe Chimie des Polymères, 4 place Jussieu, F-75005 Paris, France.

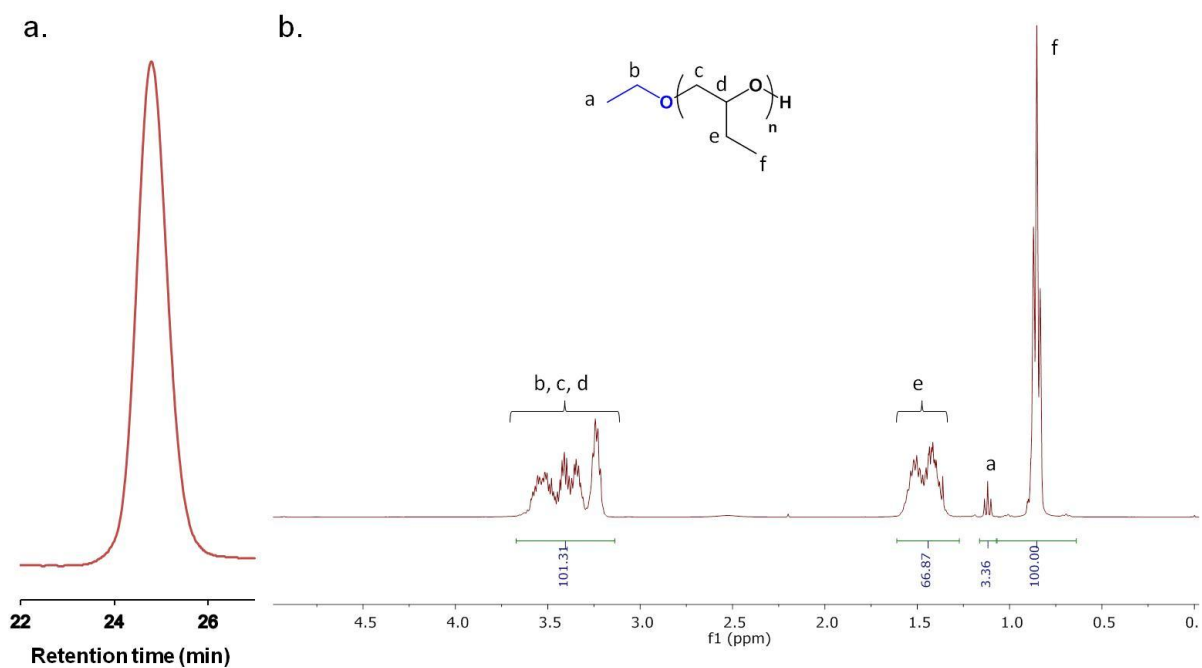

**Figure S1.** SEC traces (left) and <sup>1</sup>H NMR spectrum in CDCl<sub>3</sub> (right) of a poly(butylene oxide) synthesized with *N*-ethylurethane-*t*BuP<sub>4</sub> as initiating system (Table 1, run 1).

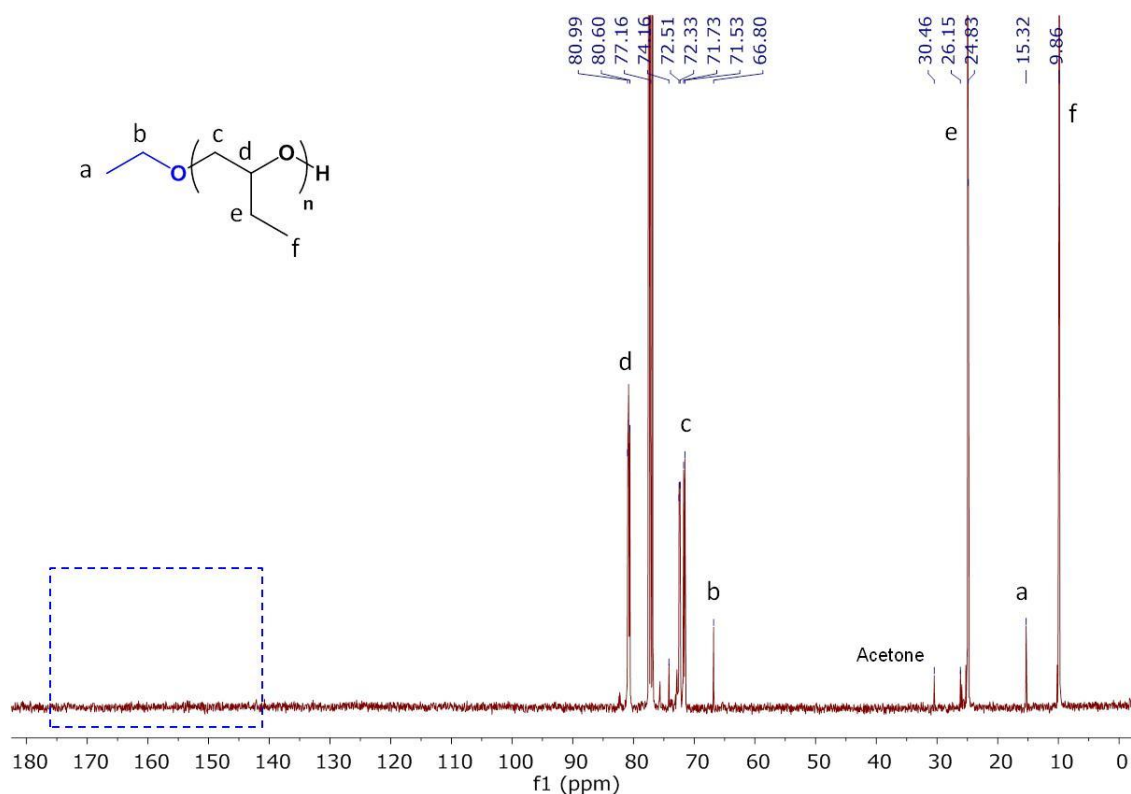

**Figure S2.** <sup>13</sup>C NMR spectrum in CDCl<sub>3</sub> of a poly(butylene oxide) synthesized with *N*-ethylurethane-*t*BuP<sub>4</sub> as initiating system (Table 1, run 1).

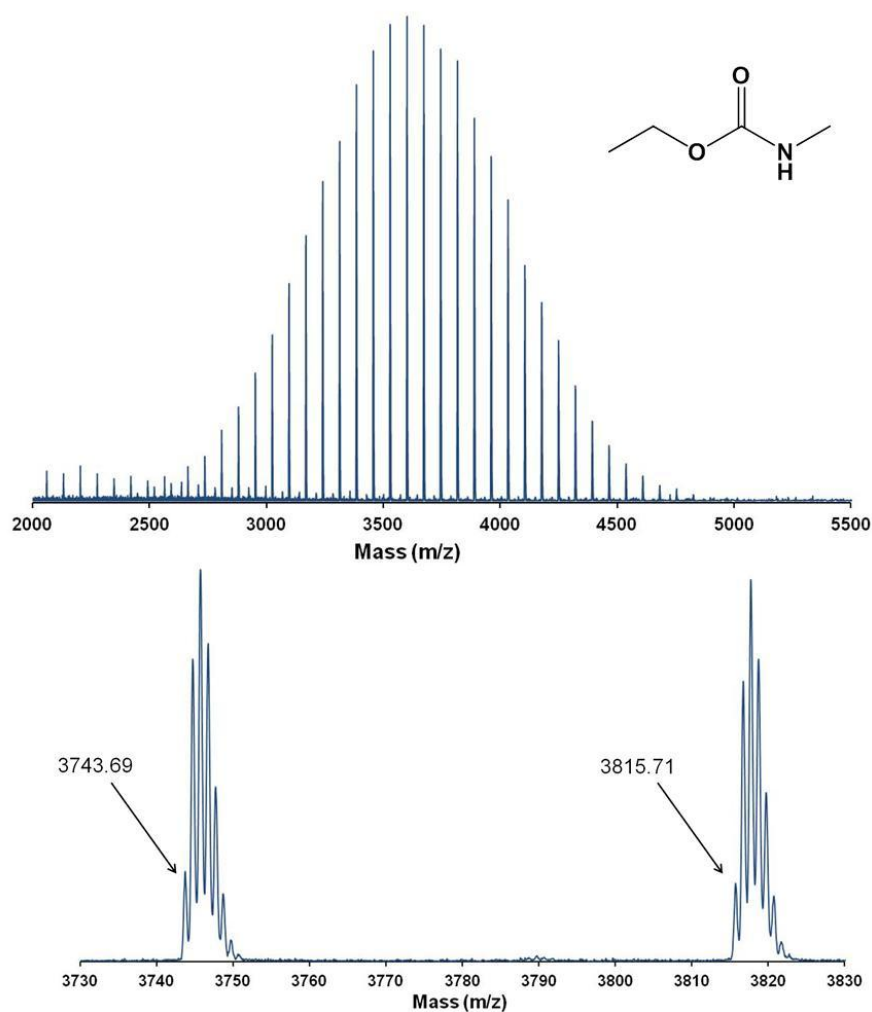

| $\alpha$ -end group | $\Omega$ -end group | Cation          | DP | Calculated exact mass |
|---------------------|---------------------|-----------------|----|-----------------------|
|                     |                     | Na <sup>+</sup> | 51 | 3800.99               |
|                     |                     | Na <sup>+</sup> | 52 | 3816.02               |
|                     |                     | Na <sup>+</sup> | 52 | 3801.02               |

**Figure S3.** MALDI-ToF spectra (top: linear mode; bottom: reflectron mode) of a poly(butylene oxide) synthesized with *N*-Methylurethane-*t*BuP<sub>4</sub> as initiating system (Table 1, run 4).

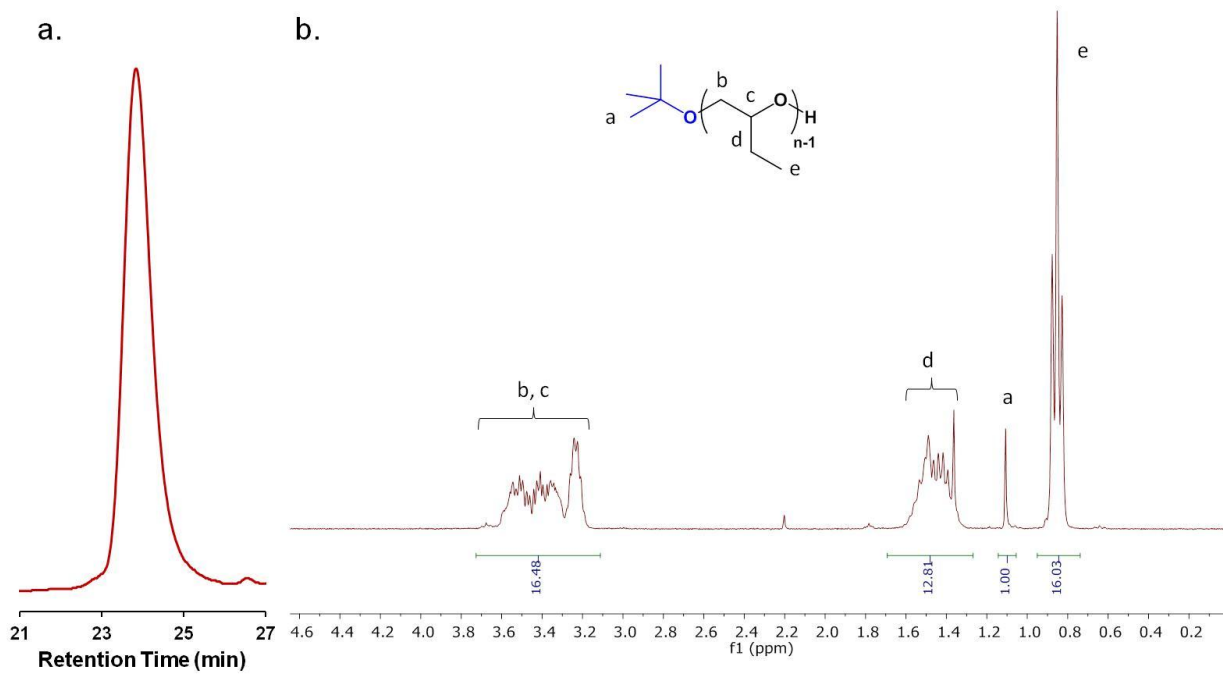

**Figure S4.** SEC traces (left) and <sup>1</sup>H NMR spectrum in CDCl<sub>3</sub> (right) of a poly(butylene oxide) synthesized with *tert*-butyl *N*-allylcarbamate / *t*BuP<sub>4</sub> as initiating system (Table 1, run 5).

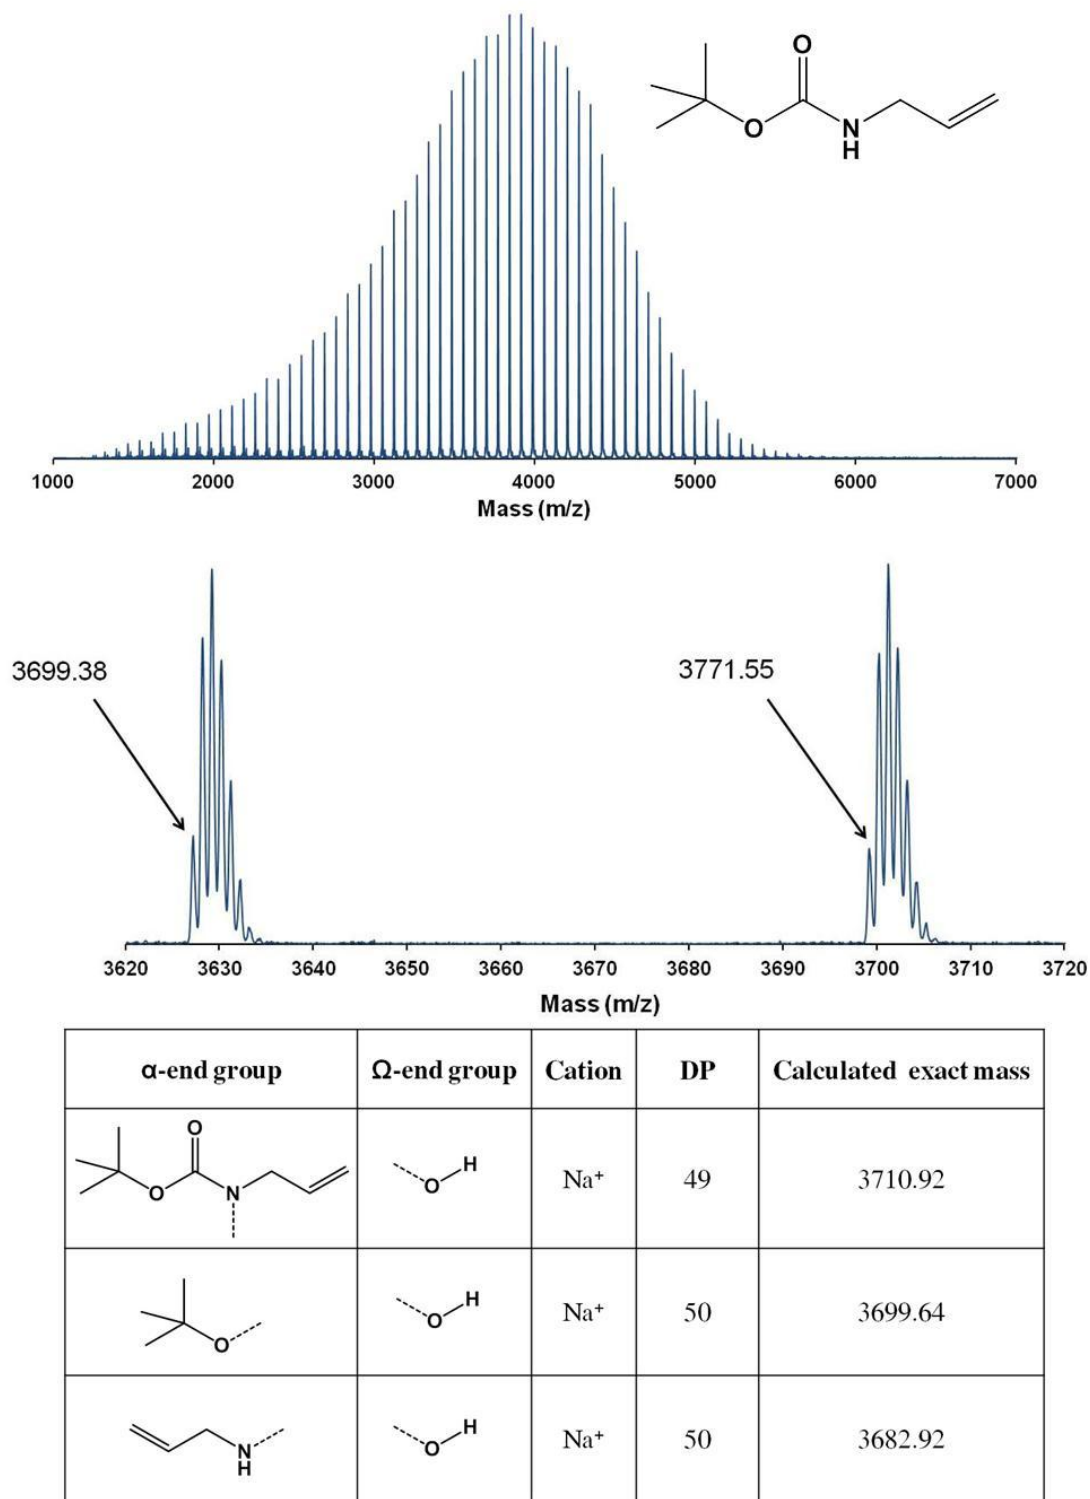

**Figure S5.** MALDI-ToF spectra (top: linear mode; bottom: reflectron mode) of a poly(butylene oxide) synthesized with *tert*-butyl *N*-allylcarbamate / *t*BuP<sub>4</sub> as initiating system (Table 1, run 5).

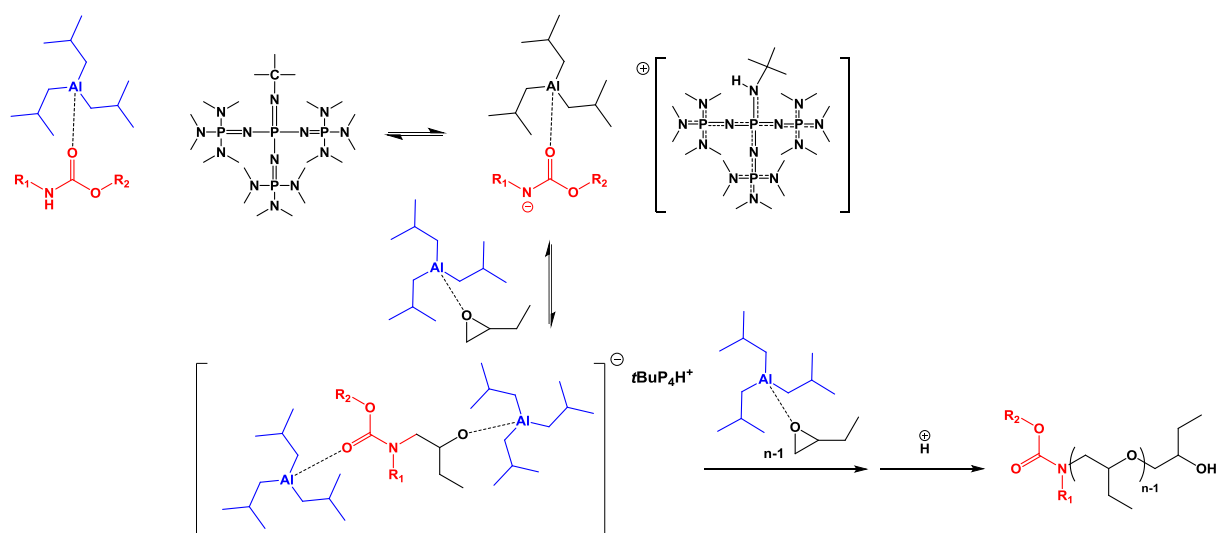

**Figure S6.** Postulated mechanism for the ROP of 1,2-epoxybutane using secondary urethane-triisobutylaluminum-phosphazene base (1-3-1) as initiating system.

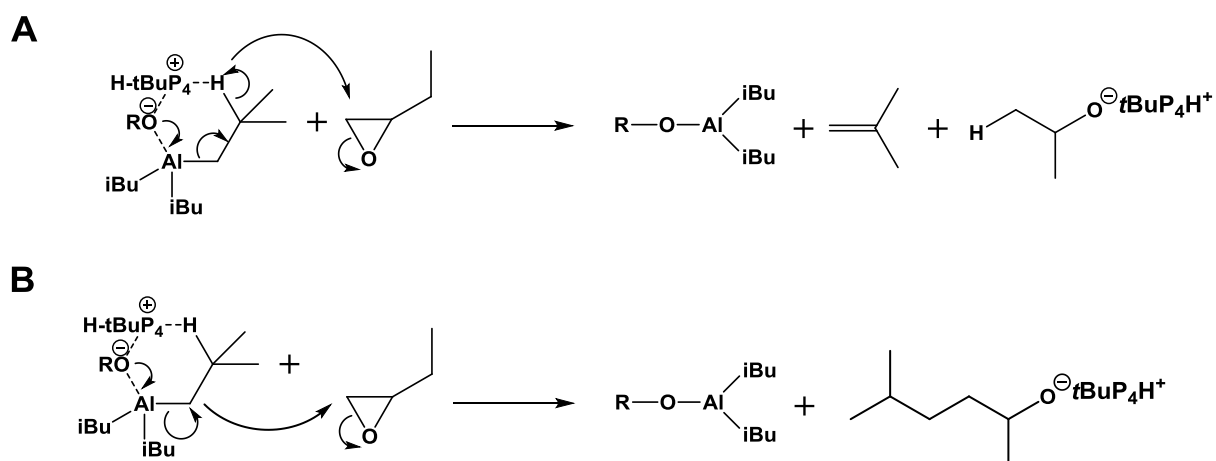

**Figure S7.** Proposed mechanisms for the transfer reactions during the anionic ring-opening polymerization of 1,2-epoxybutane in presence of triisobutylaluminum.

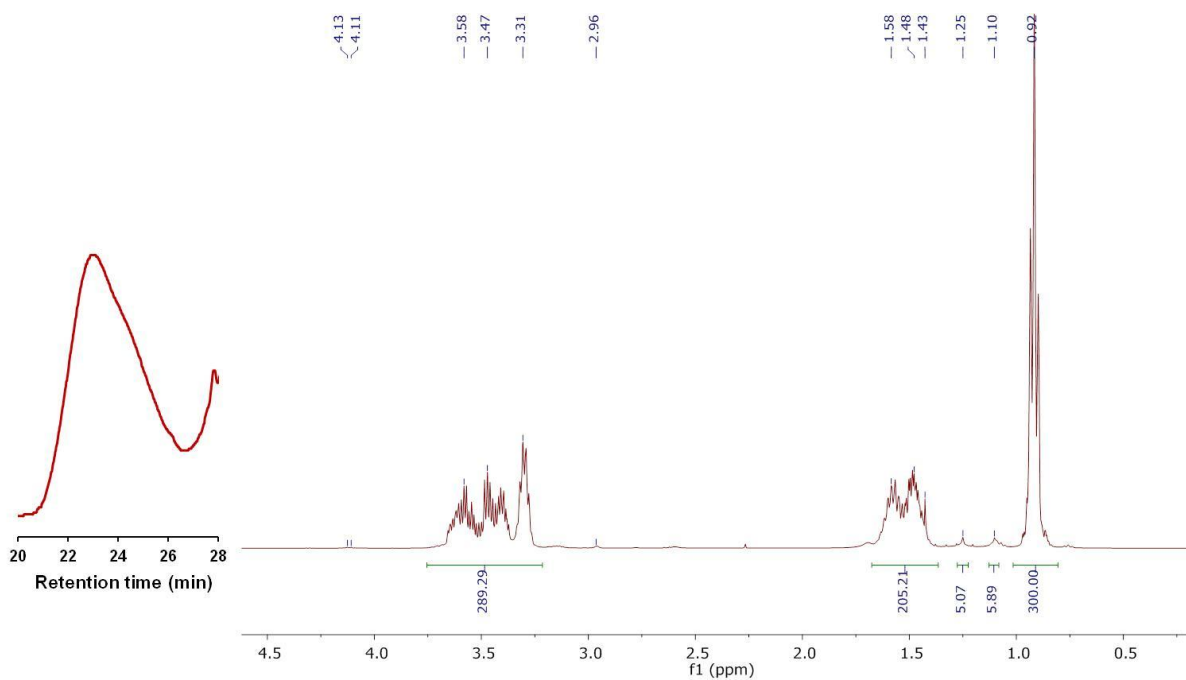

**Figure S8.** SEC traces (left) and <sup>1</sup>H NMR spectrum in CDCl<sub>3</sub> (right) of a poly(butylene oxide) synthesized with *N*-methylurethane / *i*Bu<sub>3</sub>Al / *t*BuP<sub>4</sub> (1 / 3 / 1) as initiating system (Table 2, run 1).

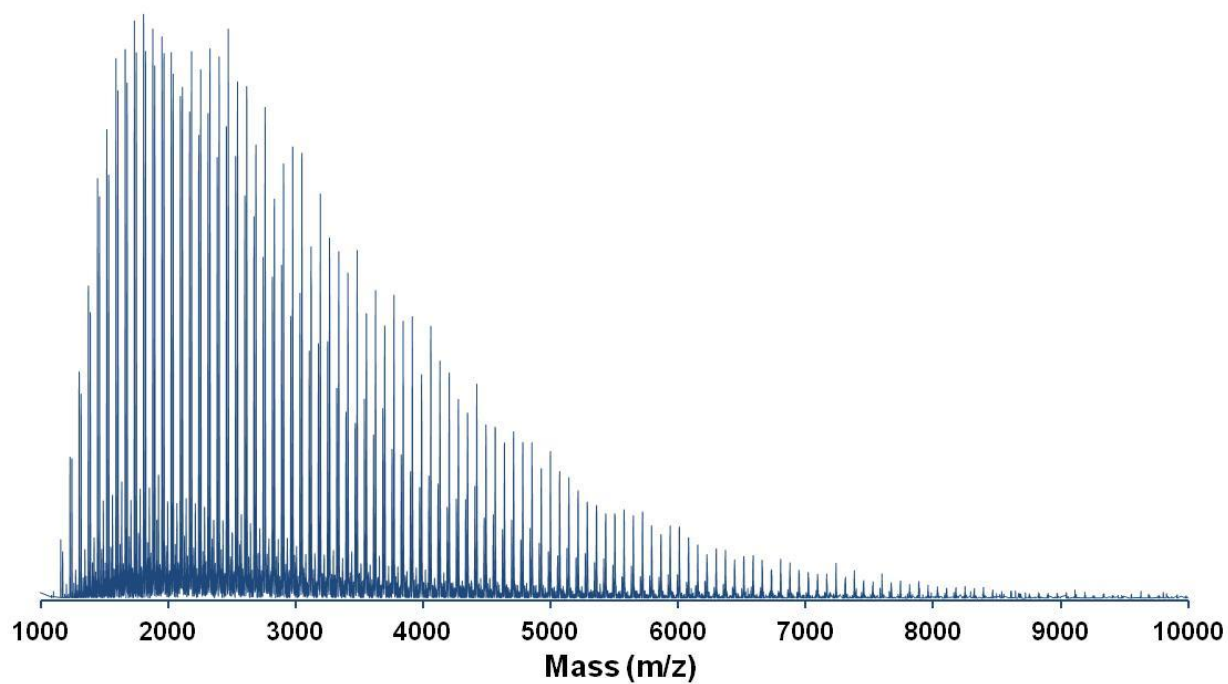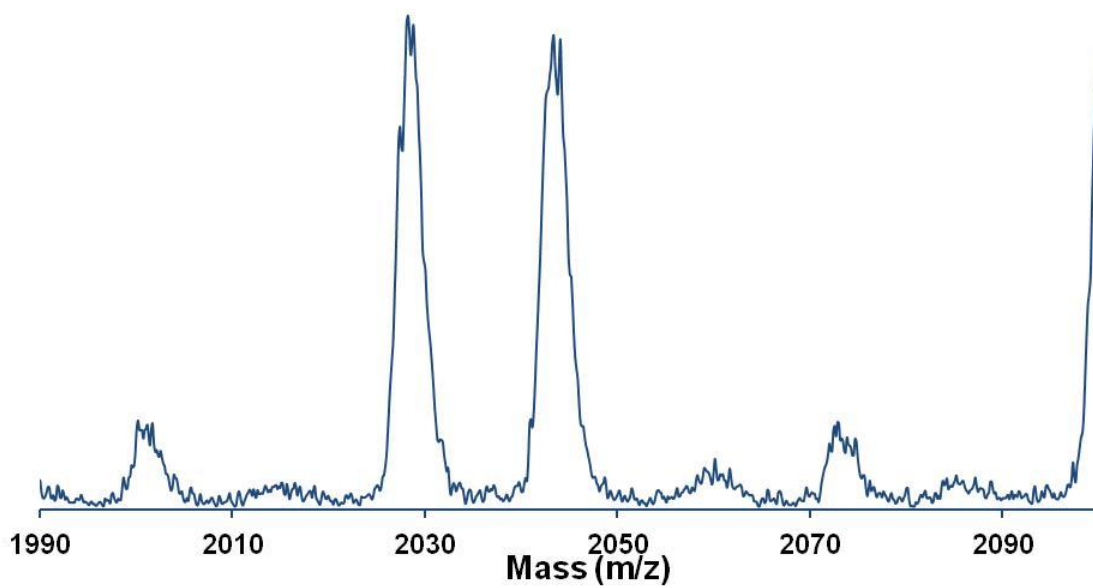

**Figure S9.** MALDI-ToF spectra (linear mode) of a poly(butylene oxide) synthesized with *N*-methylurethane / *i*Bu<sub>3</sub>Al / *t*BuP<sub>4</sub> (1 / 3 / 1) as initiating system in toluene (Table 2, run 1).



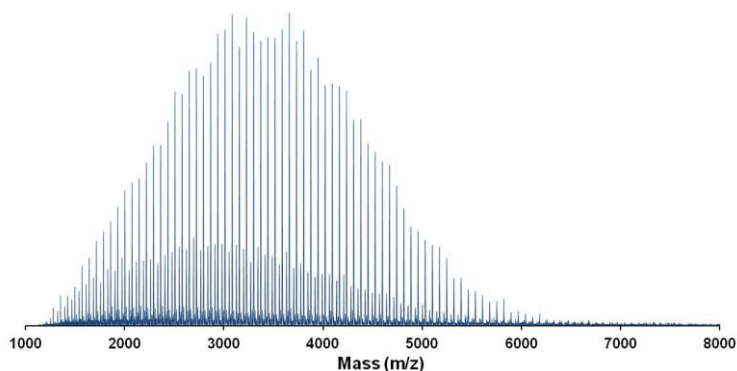

**Figure S10.** MALDI-ToF spectra (linear mode) of a poly(butylene oxide) synthesized with *N*-methylurethane / *i*Bu<sub>3</sub>Al / *t*BuP<sub>4</sub> (1 / 1 / 1) as initiating system in toluene (Table 2, run 2).

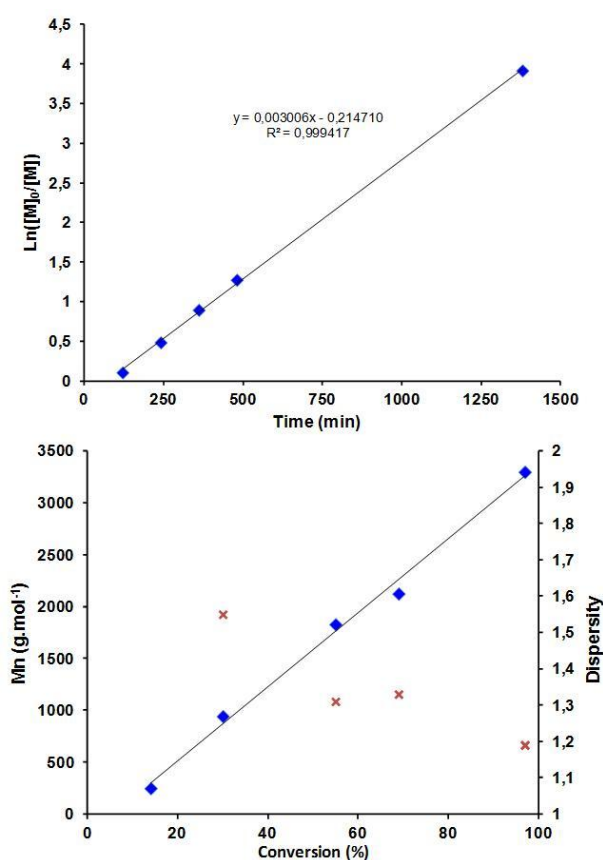

**Figure S11.** Anionic ring-opening polymerization of 1,2-epoxybutane synthesized with *N*-methylurethane / *i*Bu<sub>3</sub>Al / *t*BuP<sub>4</sub> as initiating system in toluene (Table 2, run 2) at 25 °C in toluene ( $[I]_0 = 0.06534 \text{ mol.L}^{-1}$ ,  $[M]_0 = 3.27 \text{ mol.L}^{-1}$ , M:*N*-methylurethane:*i*Bu<sub>3</sub>Al:*t*BuP<sub>4</sub> = 50:1:1:1:1): (a) first-order kinetic plot ; (b) relationship observed between number-average molar mass (squares; linear trend is indicated by the dashed line) or dispersity (crosses) and monomer conversion.

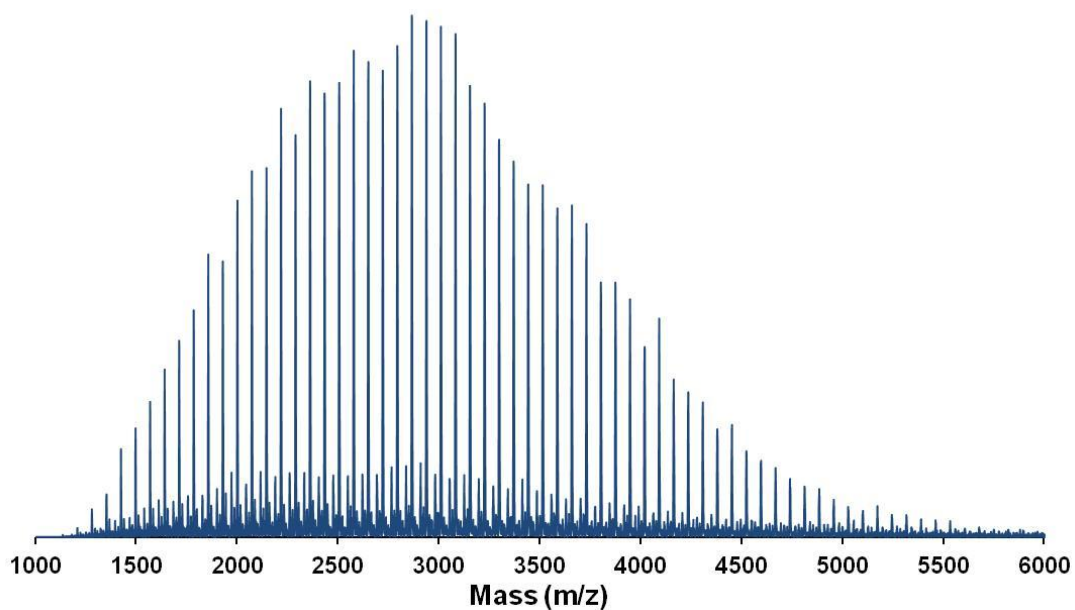

**Figure S12.** MALDI-ToF spectra (linear mode) of a poly(butylene oxide) synthesized with *N*-methylurethane /  $i\text{Bu}_3\text{Al}$  /  $t\text{BuP}_2$  (1 / 1 / 1) as initiating system in toluene (Table 2, run 3).

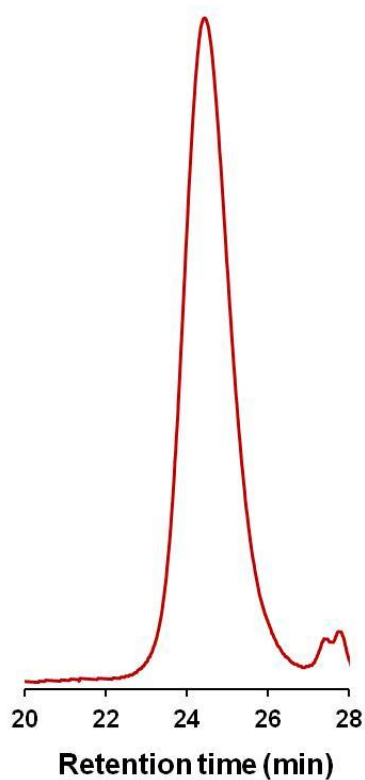

**Figure S13.** SEC trace of a poly(butylene oxide) synthesized with *N*-methylurethane /  $i\text{Bu}_3\text{Al}$  /  $t\text{BuP}_2$  (1 / 1 / 1) as initiating system in toluene (Table 2, run 3).

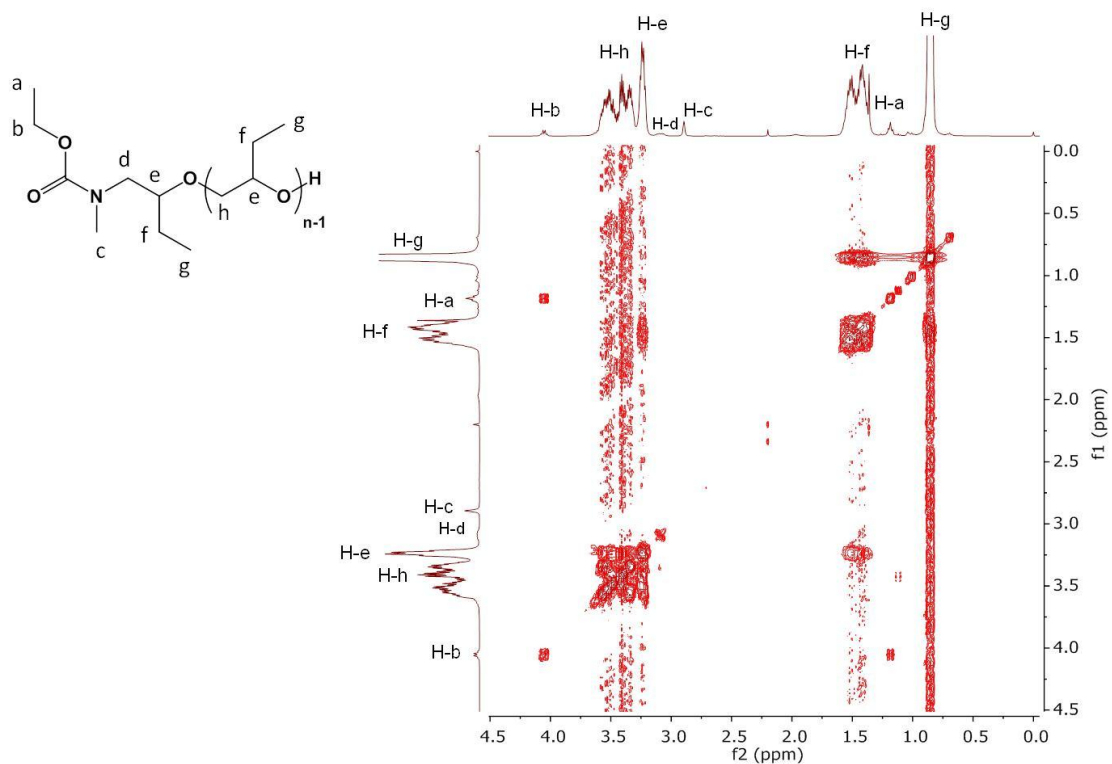

**Figure S14.** 2D COSY-NMR spectrum in  $\text{CDCl}_3$  at room temperature of a poly(butylene oxide) synthesized with *N*-methylurethane /  $i\text{Bu}_3\text{Al}$  / *t*BuP<sub>2</sub> (1 / 1 / 1) as initiating system in toluene (Table 2, run 3).

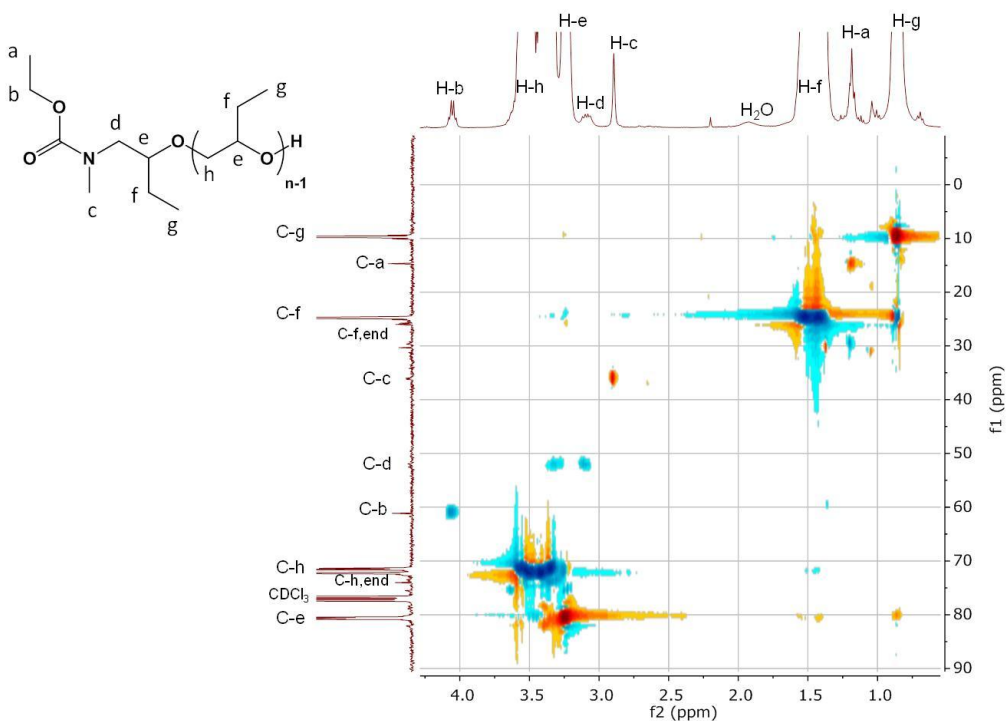

**Figure S15.** 2D HSQC-NMR spectrum in  $\text{CDCl}_3$  at room temperature of a poly(butylene oxide) synthesized with *N*-methylurethane /  $i\text{Bu}_3\text{Al}$  / *t*BuP<sub>2</sub> (1 / 1 / 1) as initiating system in toluene (Table 2, run 3).

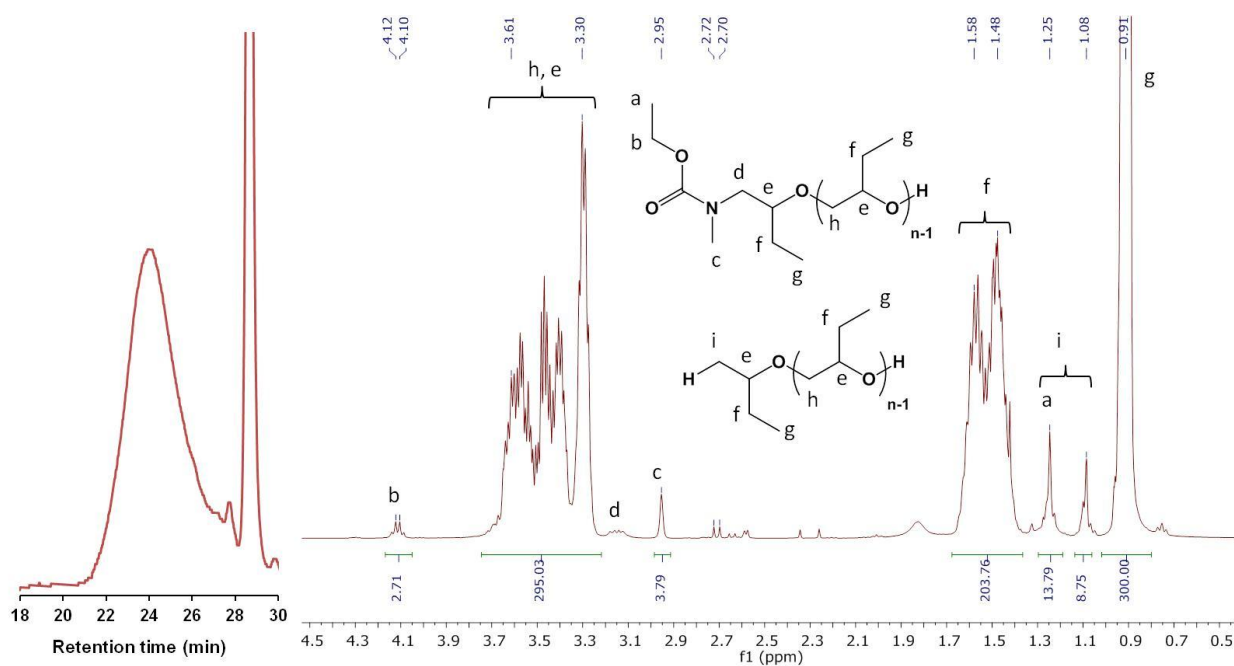

**Figure S16.** SEC traces (left) and  $^1\text{H}$  NMR spectrum in  $\text{CDCl}_3$  (right) of a poly(butylene oxide) synthesized with *N*-methylurethane / *i*Bu<sub>3</sub>Al / *t*BuP<sub>4</sub> (1 / 3 / 1) as initiating system in MeTHF (Table 2, run 4).

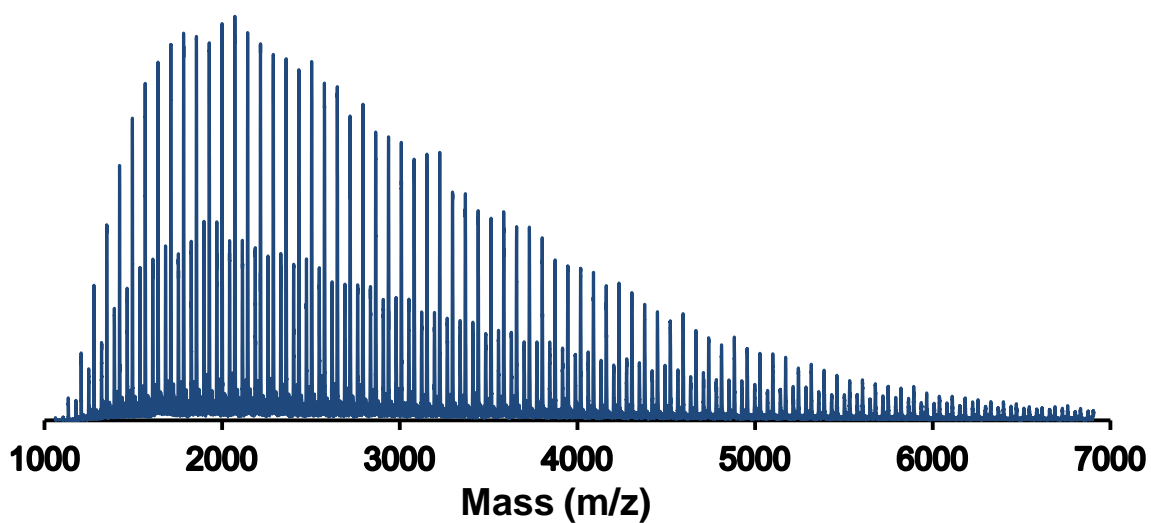

**Figure S17.** MALDI-ToF spectra (linear mode) of a poly(butylene oxide) synthesized with *N*-methylurethane / *i*Bu<sub>3</sub>Al / *t*BuP<sub>4</sub> (1 / 3 / 1) as initiating system in MeTHF (Table 2, run 4).

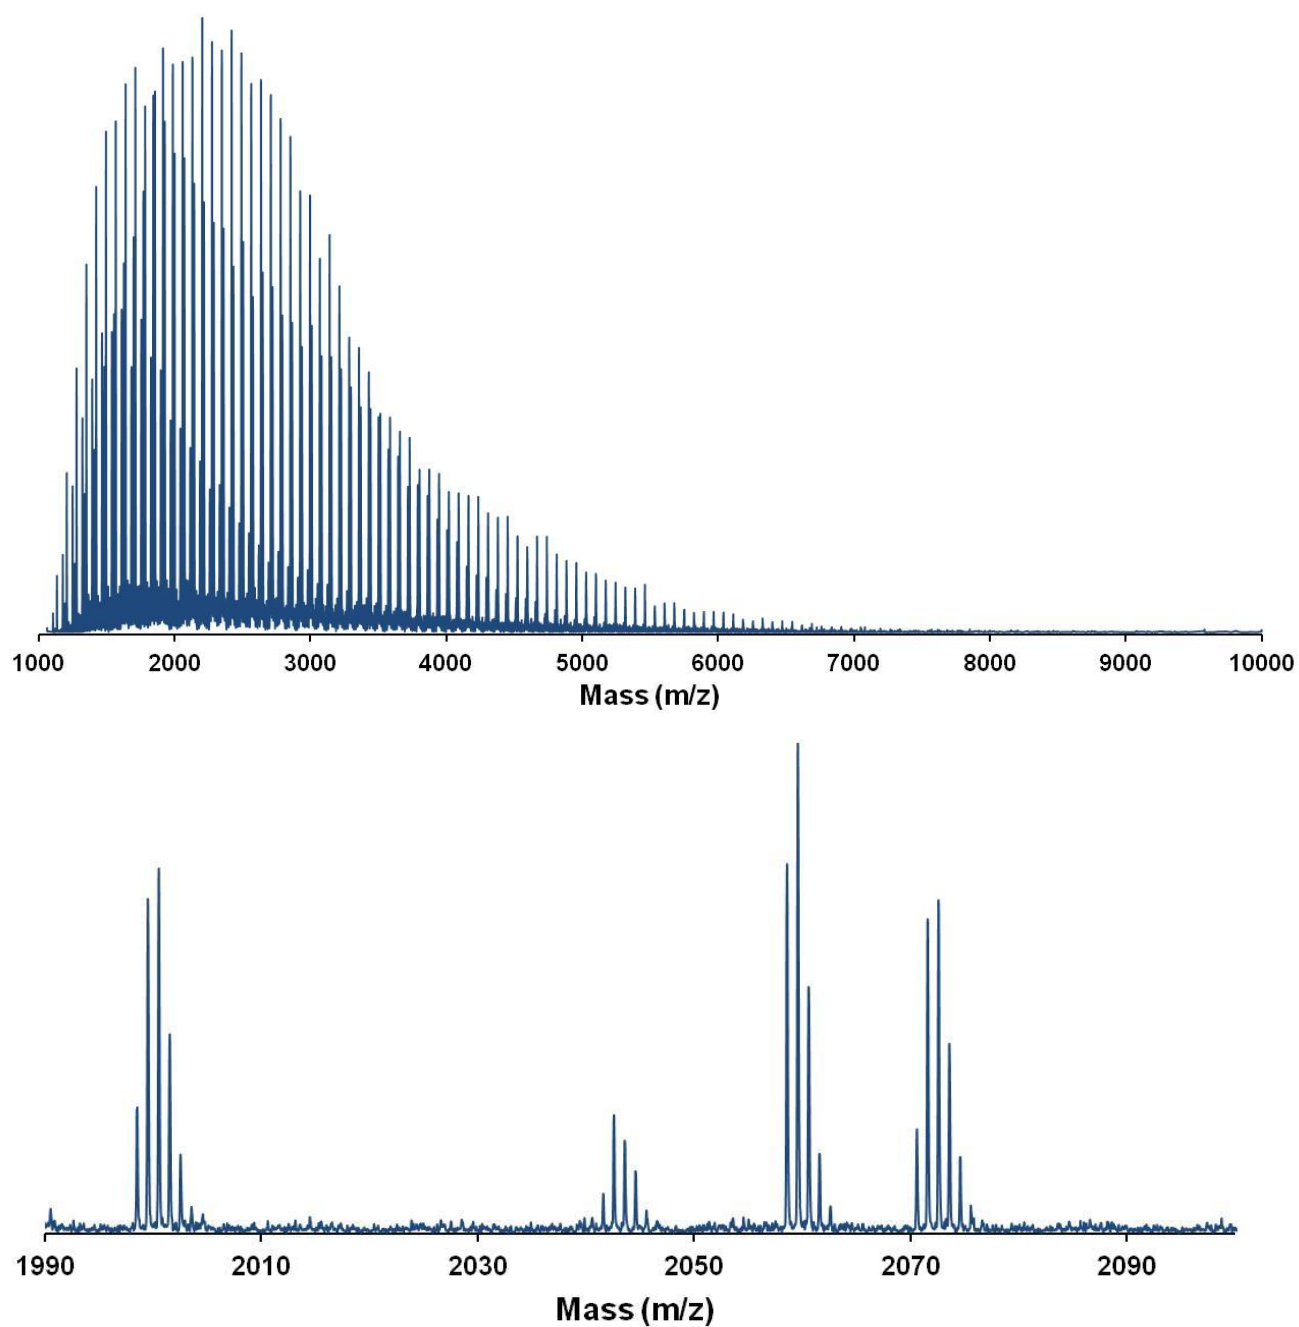

**Figure S18.** MALDI-ToF spectra (top: linear mode; bottom: reflectron mode) of a poly(butylene oxide) synthesized with *N*-methylurethane / *i*Bu<sub>3</sub>Al / *t*BuP<sub>4</sub> (1 / 3 / 1) as initiating system in MeTHF (Table 2, run 6).

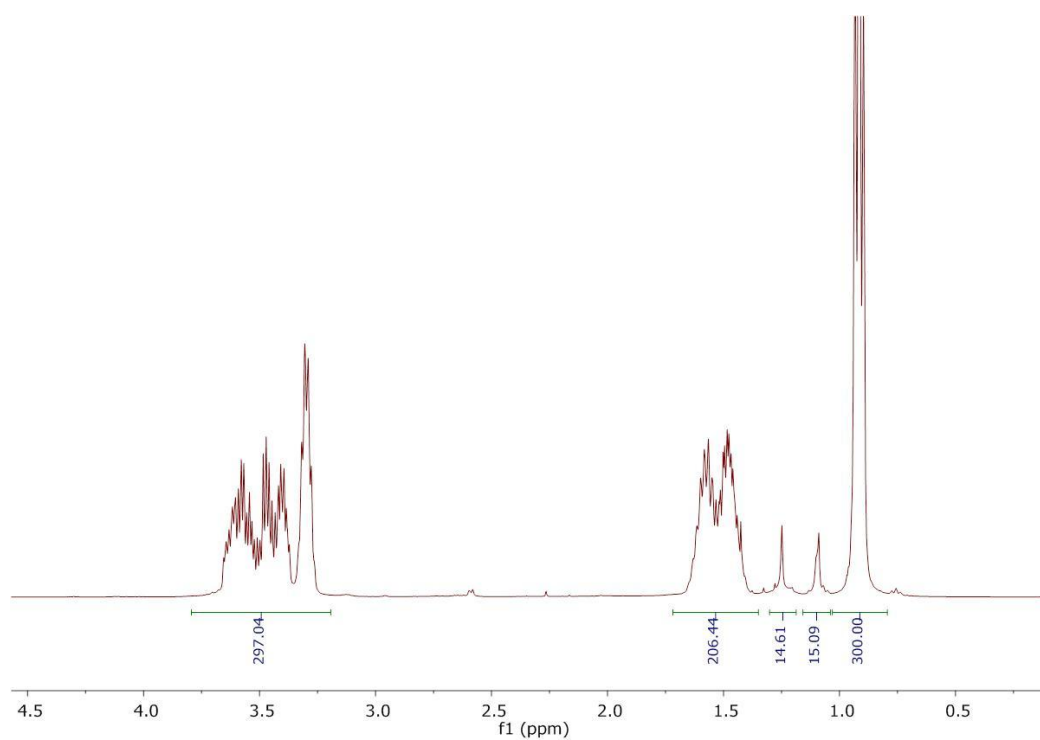

**Figure S19.**  $^1\text{H}$  NMR spectrum in  $\text{CDCl}_3$  of a poly(butylene oxide) synthesized with *N*-methylurethane / *i*Bu<sub>3</sub>Al / *t*BuP<sub>4</sub> (1 / 3 / 1) as initiating system in MeTHF (Table 2, run 7).

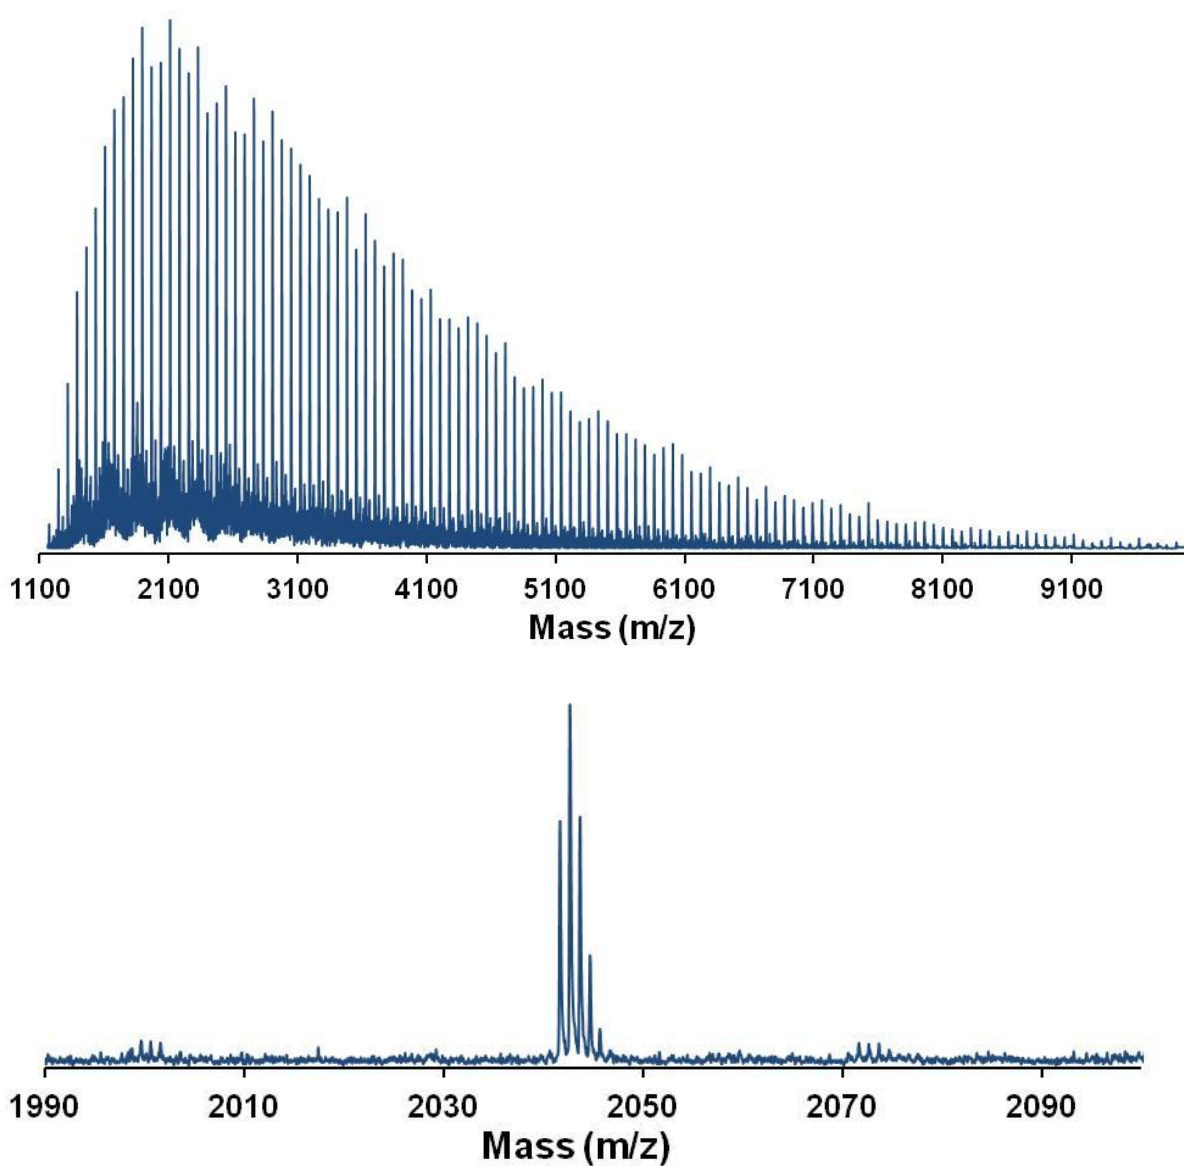

**Figure S20.** MALDI-ToF spectra (top: linear mode; bottom: reflectron mode) of a poly(butylene oxide) synthesized with *N*-methylurethane / *i*Bu<sub>3</sub>Al / *t*BuP<sub>4</sub> (1 / 3 / 1) as initiating system in MeTHF (Table 2, run 7).

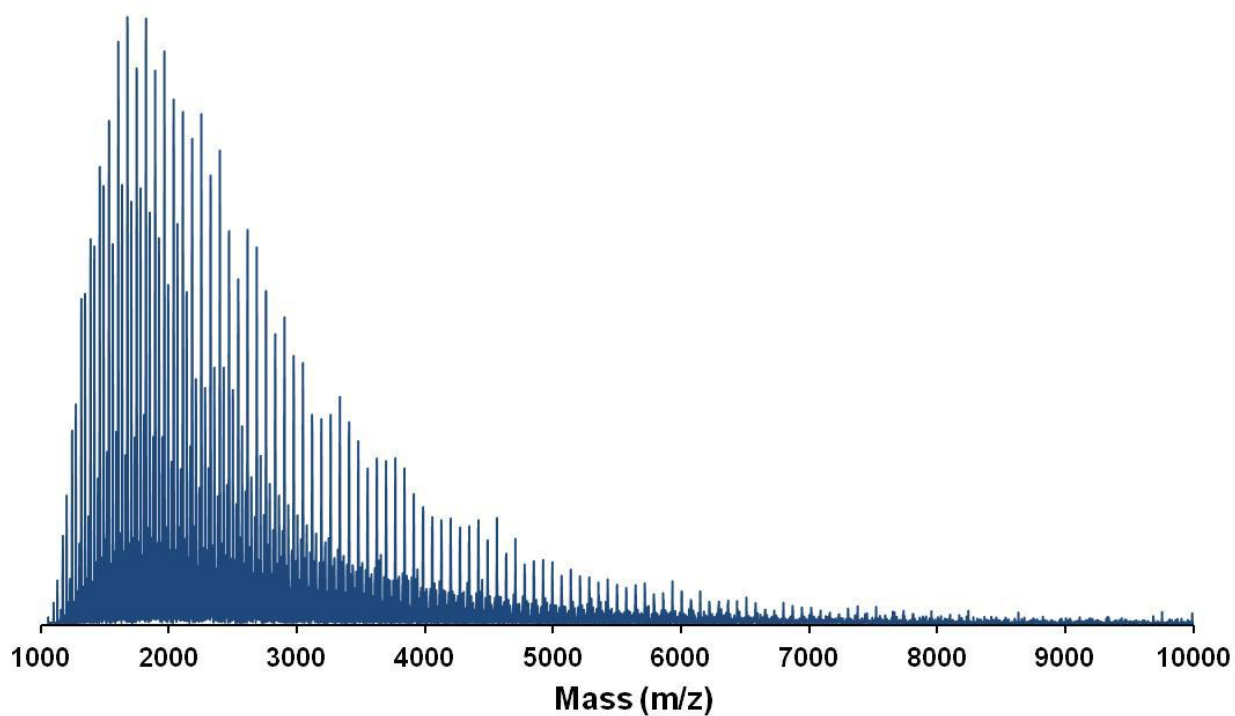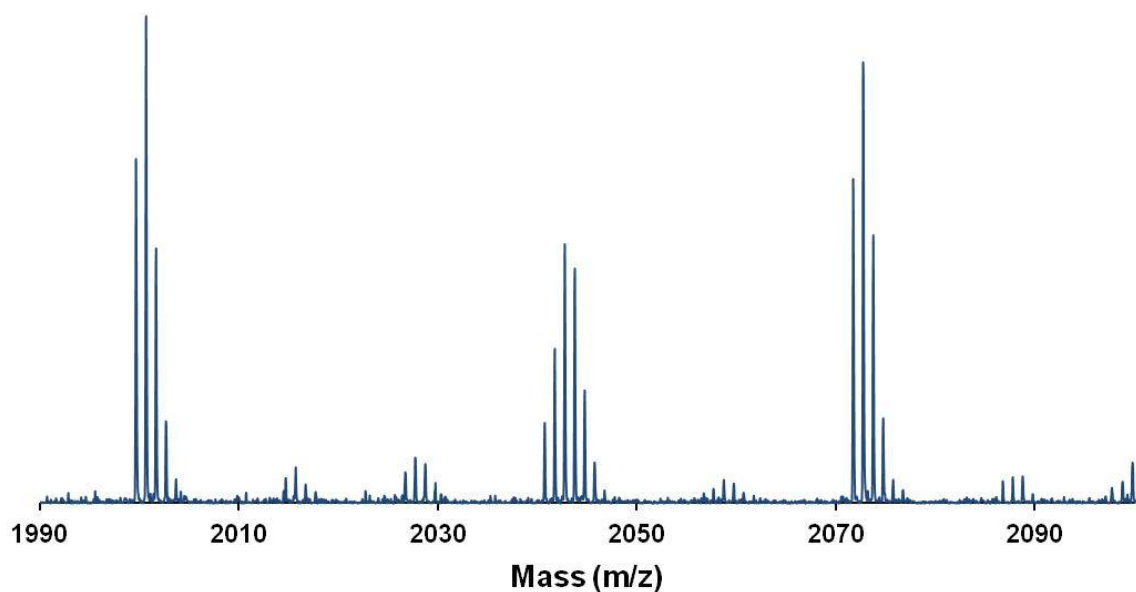

**Figure S21.** MALDI-ToF spectra (top: linear mode; bottom: reflectron mode) of a poly(butylene oxide) synthesized with *N*-methylurethane / *i*Bu<sub>3</sub>Al / *t*BuP<sub>4</sub> (1 / 3 / 1) as initiating system in MeTHF (Table 2, run 8).



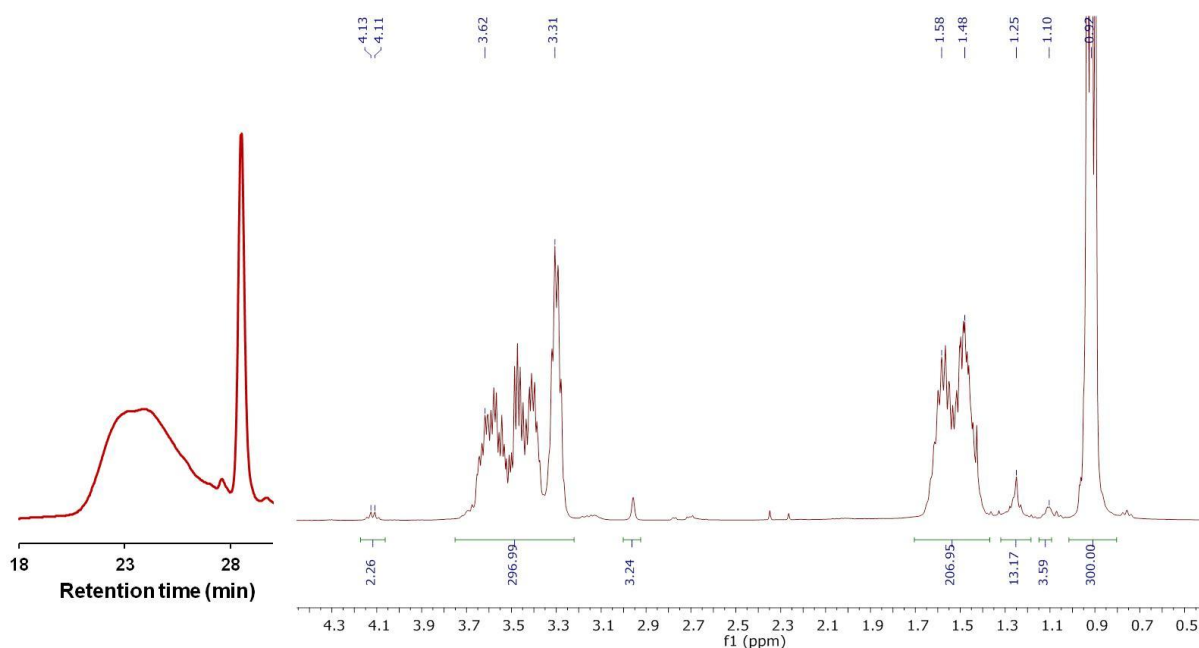

**Figure S22.** SEC traces (left) and <sup>1</sup>H NMR spectrum in CDCl<sub>3</sub> (right) of a poly(butylene oxide) synthesized with *N*-methylurethane / *i*Bu<sub>3</sub>Al / *t*BuP<sub>2</sub> (1 / 3 / 1) as initiating system in MeTHF (Table 2, run 9).

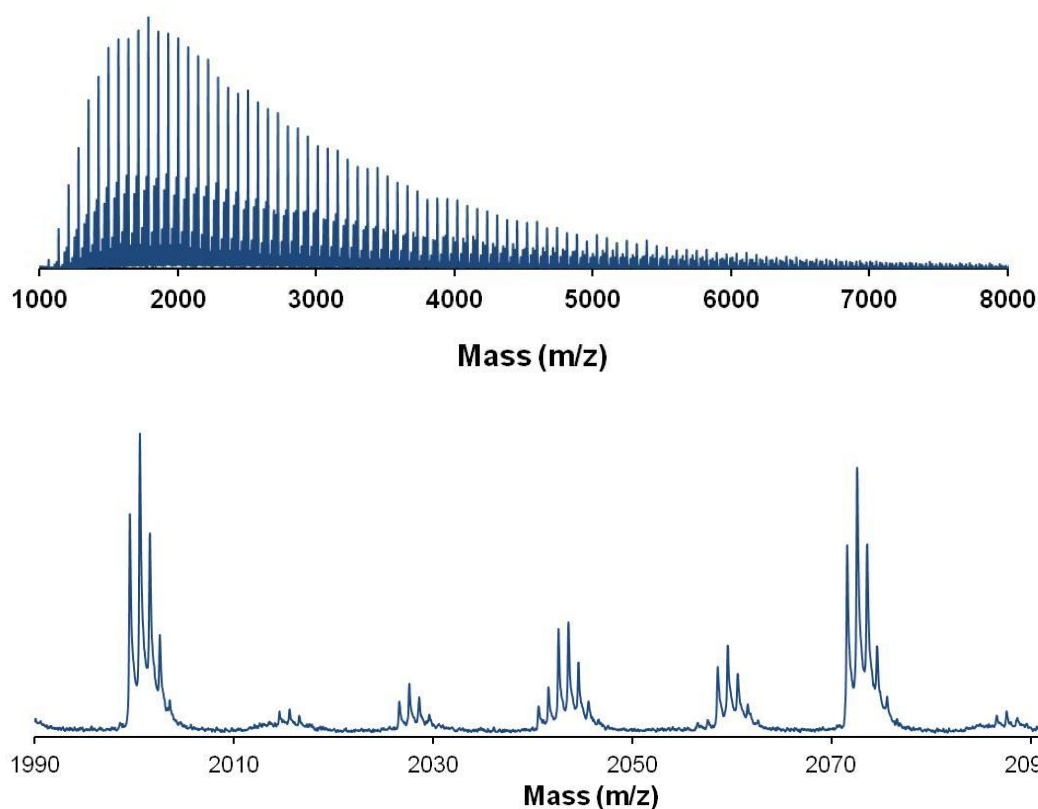

**Figure S23.** MALDI-ToF spectra (top: linear mode; bottom: reflectron mode) of a poly(butylene oxide) synthesized with *N*-methylurethane / *i*Bu<sub>3</sub>Al / *t*BuP<sub>2</sub> (1 / 3 / 1) as initiating system in MeTHF (Table 2, run 9).

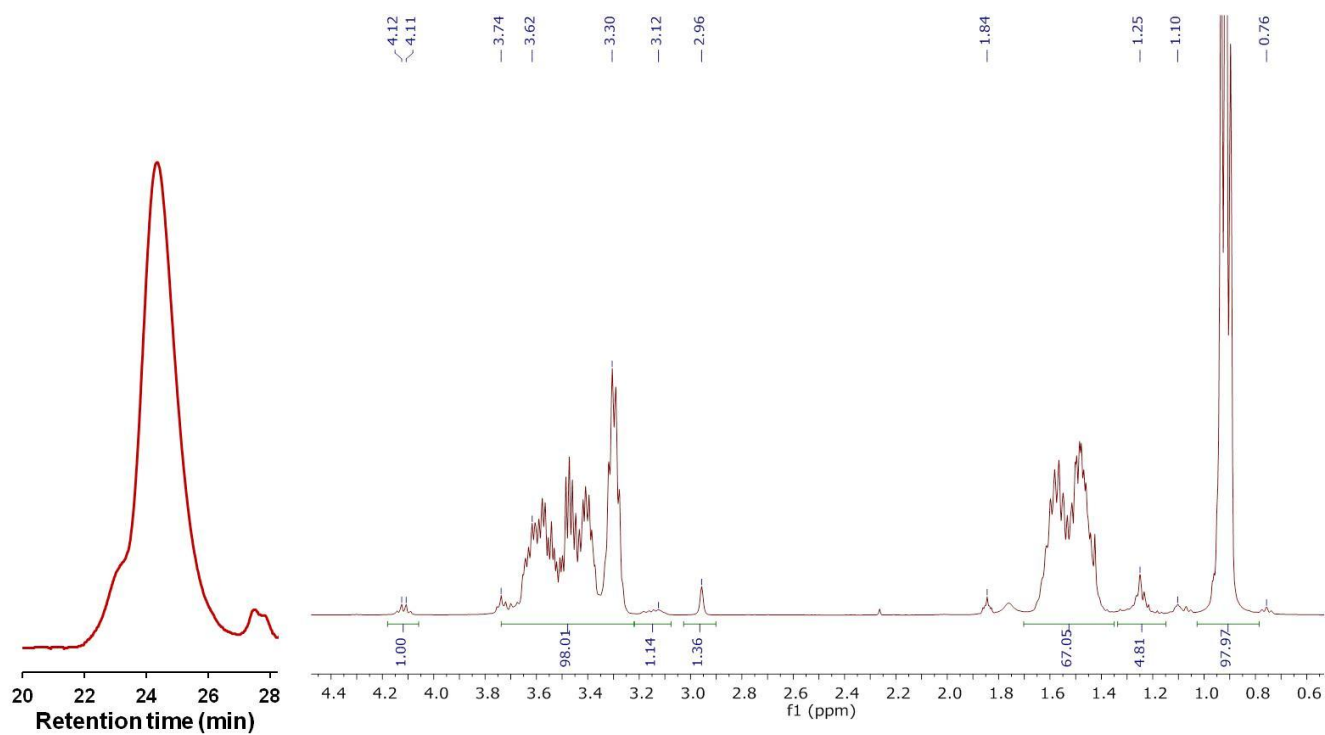

**Figure S24.** SEC traces (left) and <sup>1</sup>H NMR spectrum in CDCl<sub>3</sub> (right) of a poly(butylene oxide) synthesized with *N*-methylurethane / *i*Bu<sub>3</sub>Al / *t*BuP<sub>4</sub> (1 / 1 / 1) as initiating system in MeTHF (Table 2, run 11).

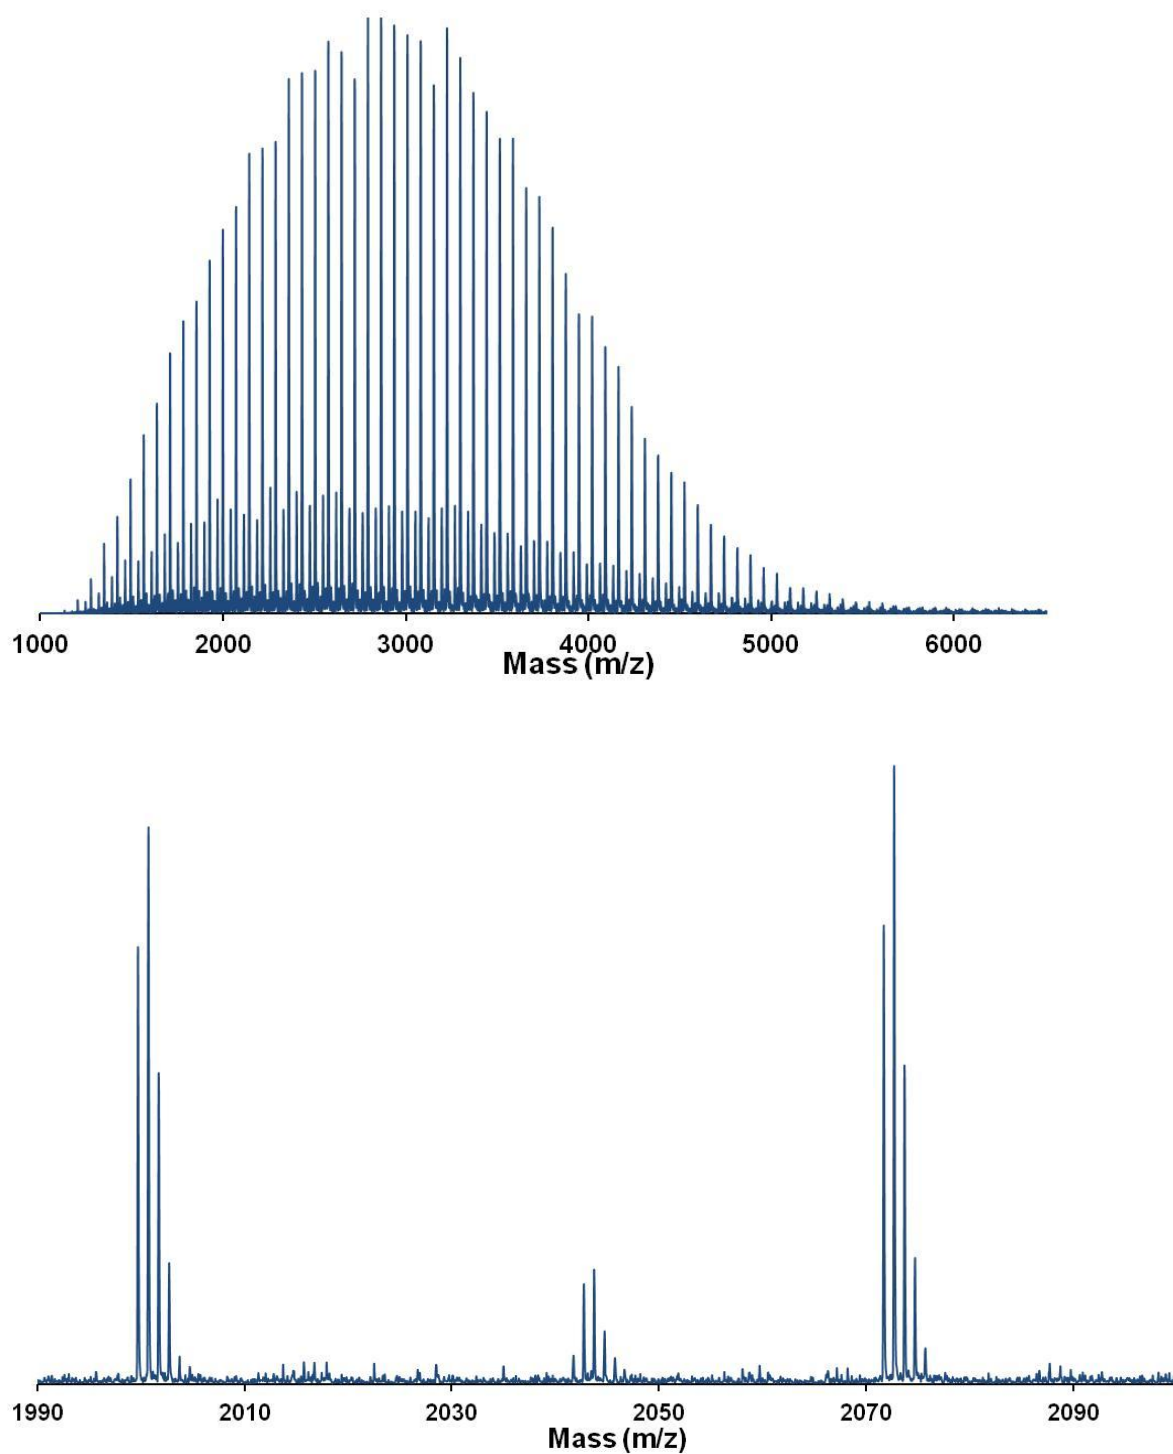

**Figure S25.** MALDI-ToF spectra (top: linear mode; bottom: reflectron mode) of a poly(butylene oxide) synthesized with *N*-methylurethane / *i*Bu<sub>3</sub>Al / *t*BuP<sub>4</sub> (1 / 1 / 1) as initiating system in MeTHF (Table 2, run 11).

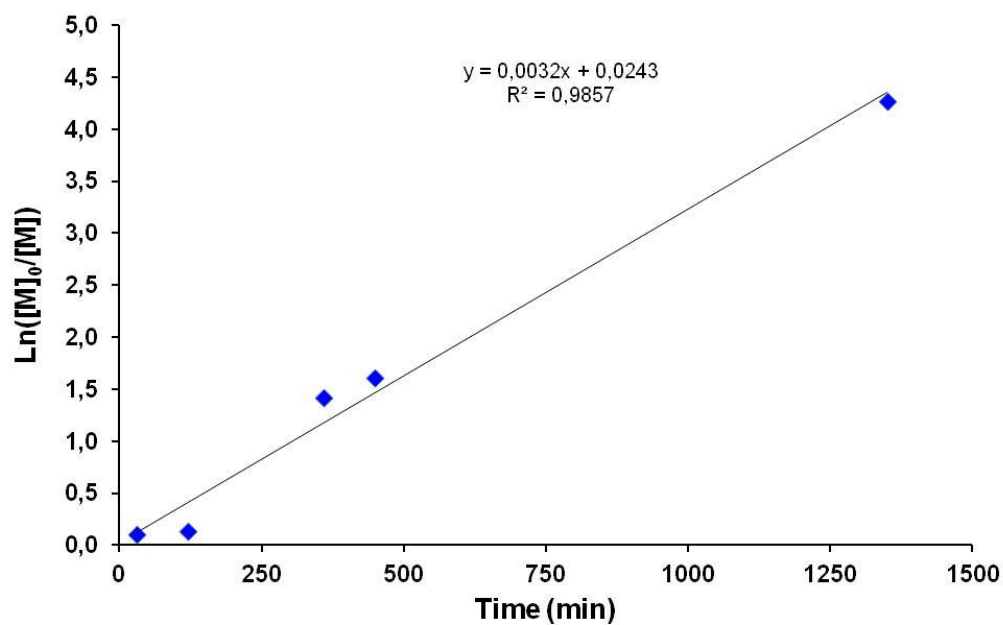

**Figure S26.** Anionic ring-opening polymerization of 1,2-epoxybutane synthesized with *N*-methylurethane / *i*Bu<sub>3</sub>Al / *t*BuP<sub>4</sub> as initiating system in MeTHF (Table 2, run 11) at 25°C ( $[I]_0 = 0.065 \text{ mol.L}^{-1}$ ,  $[M]_0 = 3.27 \text{ mol.L}^{-1}$ , M:*N*-methylurethane:*i*Bu<sub>3</sub>Al:*t*BuP<sub>4</sub> = 50:1:1:1): first-order kinetic plot (slope =  $0.0032 \text{ min}^{-1}$ ,  $R^2 = 0.986$ ).

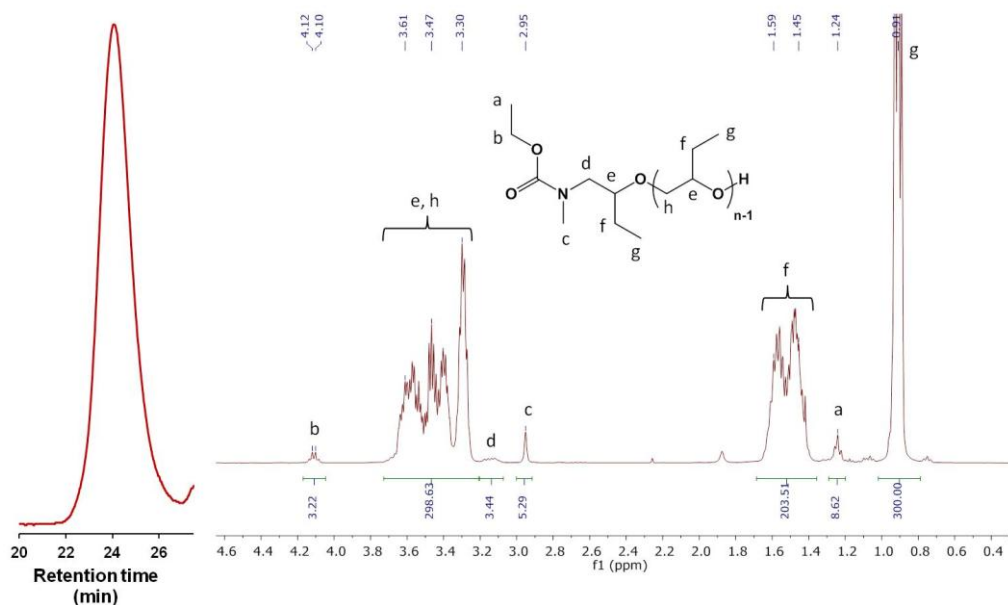

**Figure S27.** SEC traces (left) and <sup>1</sup>H NMR spectrum in CDCl<sub>3</sub> (right) of a poly(butylene oxide) synthesized with *N*-methylurethane / *i*Bu<sub>3</sub>Al / *t*BuP<sub>2</sub> (1 / 1 / 1) as initiating system in MeTHF (Table 2, run 12).

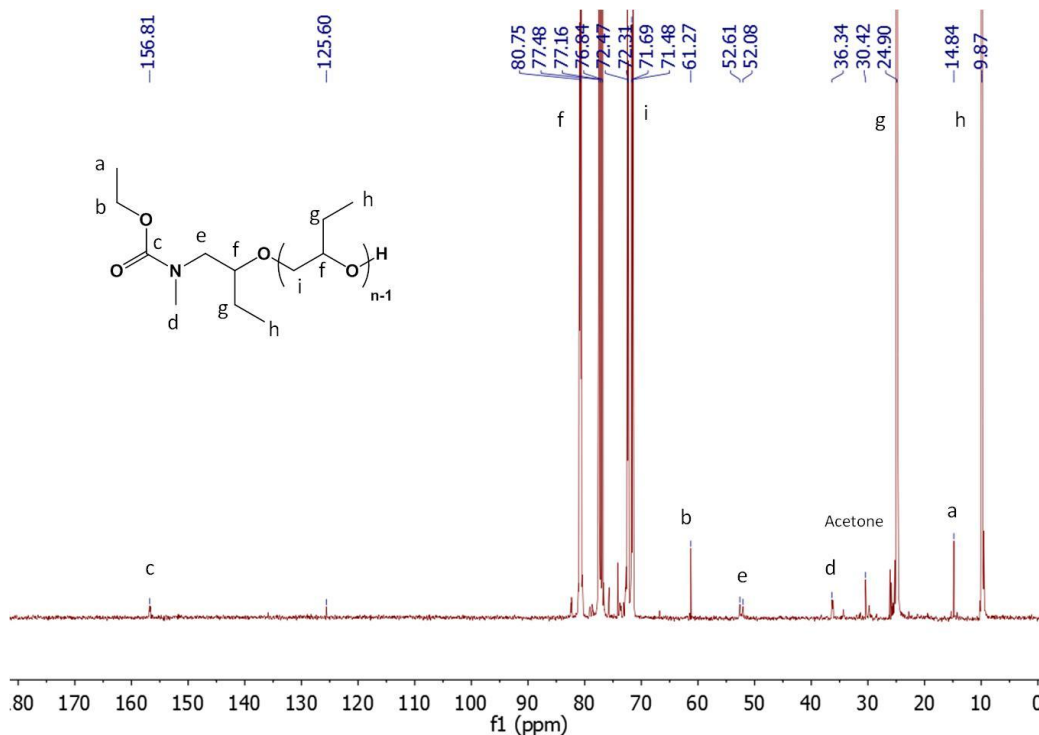

**Figure S28.** <sup>13</sup>C NMR spectrum in CDCl<sub>3</sub> of a poly(butylene oxide) synthesized with *N*-methylurethane / *i*Bu<sub>3</sub>Al / *t*BuP<sub>2</sub> (1 / 1 / 1) as initiating system in MeTHF (Table 2, run 12).

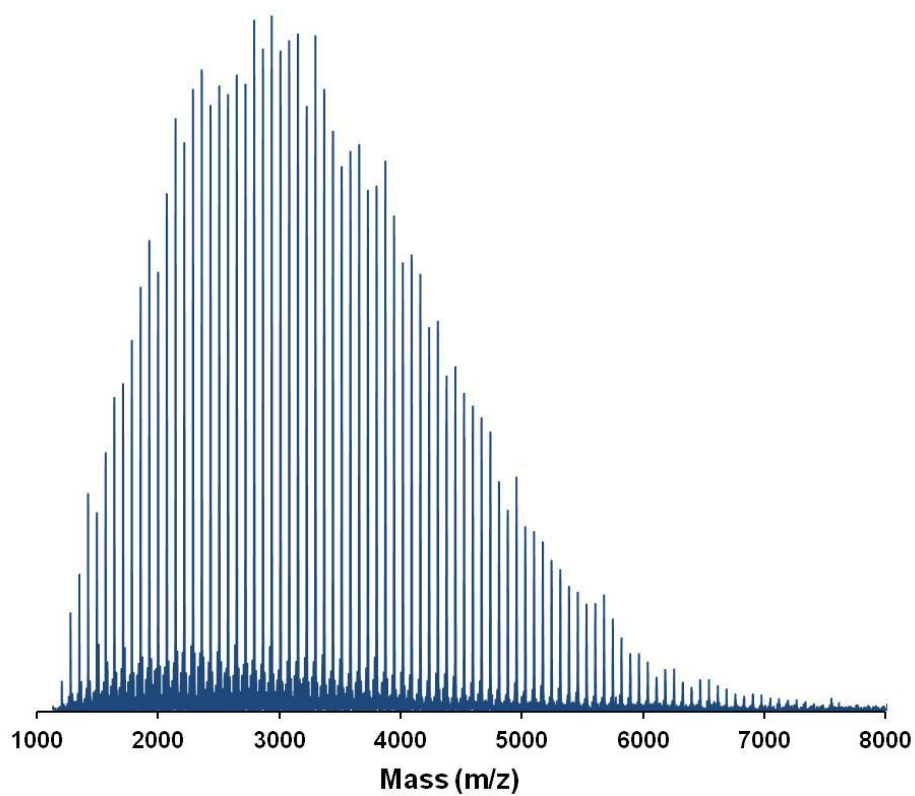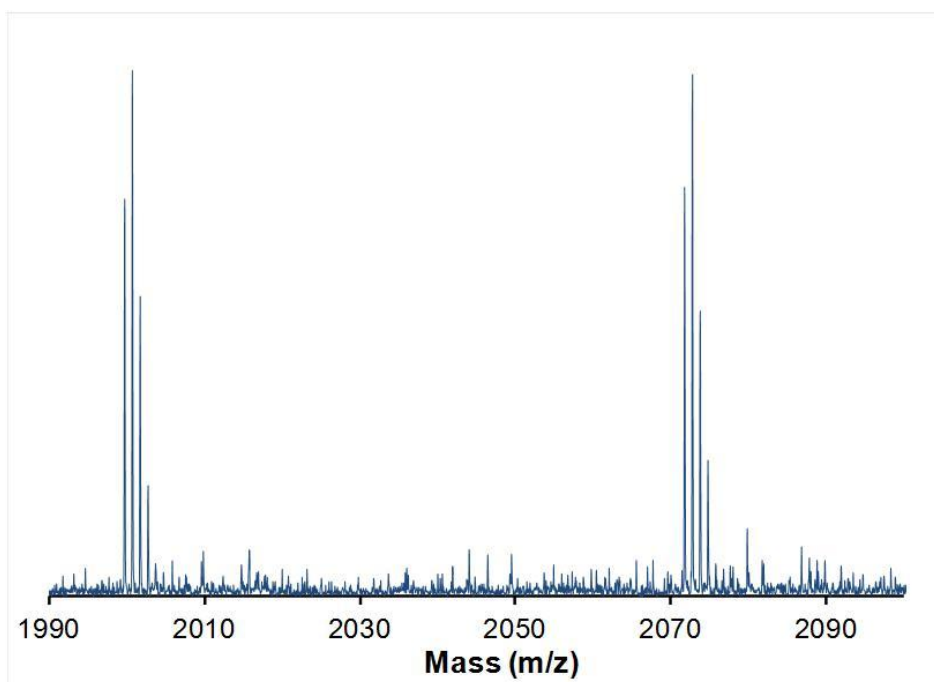

**Figure S29.** MALDI-ToF spectra (top: linear mode; bottom: reflectron mode) of a poly(butylene oxide) synthesized with *N*-methylurethane / *i*Bu<sub>3</sub>Al / *t*BuP<sub>2</sub> (1 / 1 / 1) as initiating system in MeTHF (Table 2, run 12).
